# Supplementary material
Source: PubMed Central journal article supplement (PMC5685663)
Supplement: NIHMS907534-supplement-Supplemental_material.pdf [file NIHMS907534-supplement-Supplemental_material.pdf]

# SUPPLEMENTAL MATERIAL

*Figure I: Probability of Microbleed Presence by Brain Volume (from Poisson Model)*

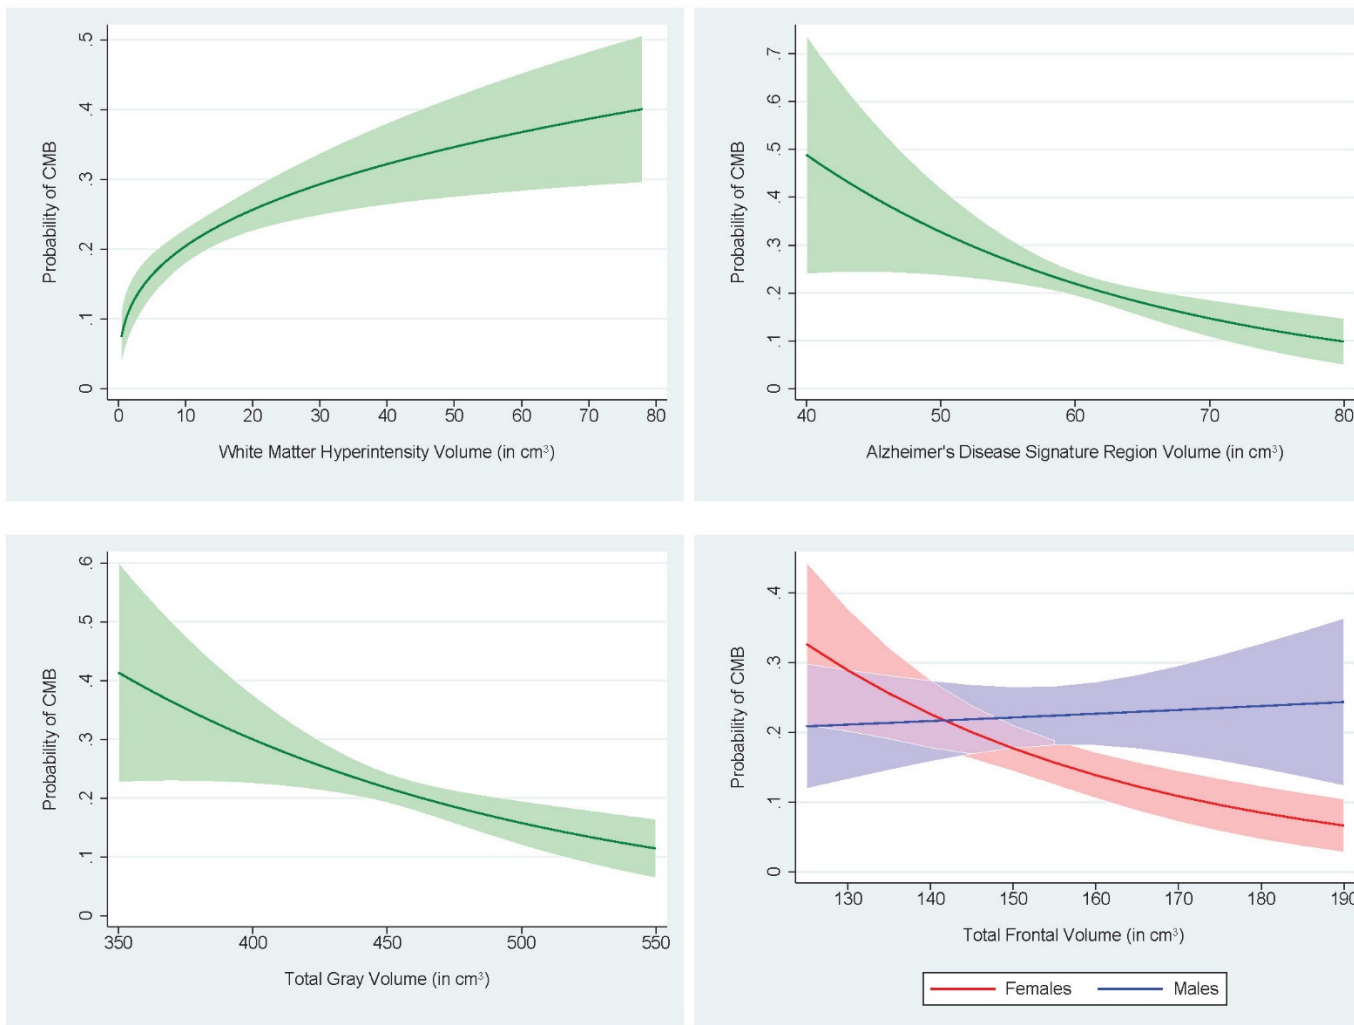

**Figure II: Probability of Microbleed Presence by Infarct Count and APOE Genotype (from Poisson Model)**

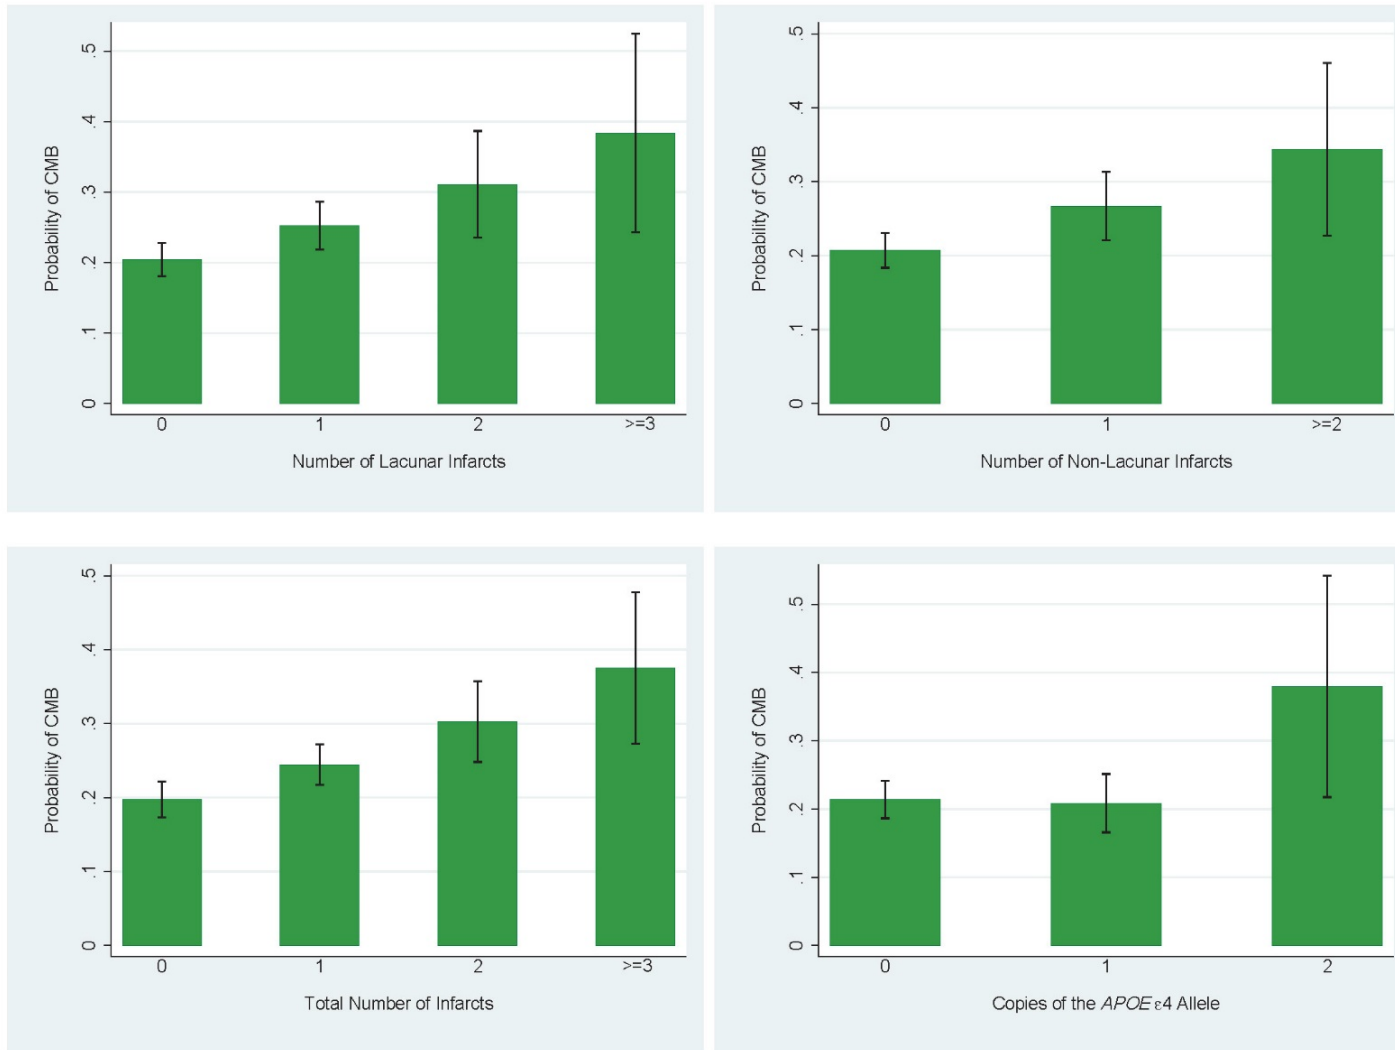

**Figure III: Probability of Cerebral Microbleeds by Brain Volumes**

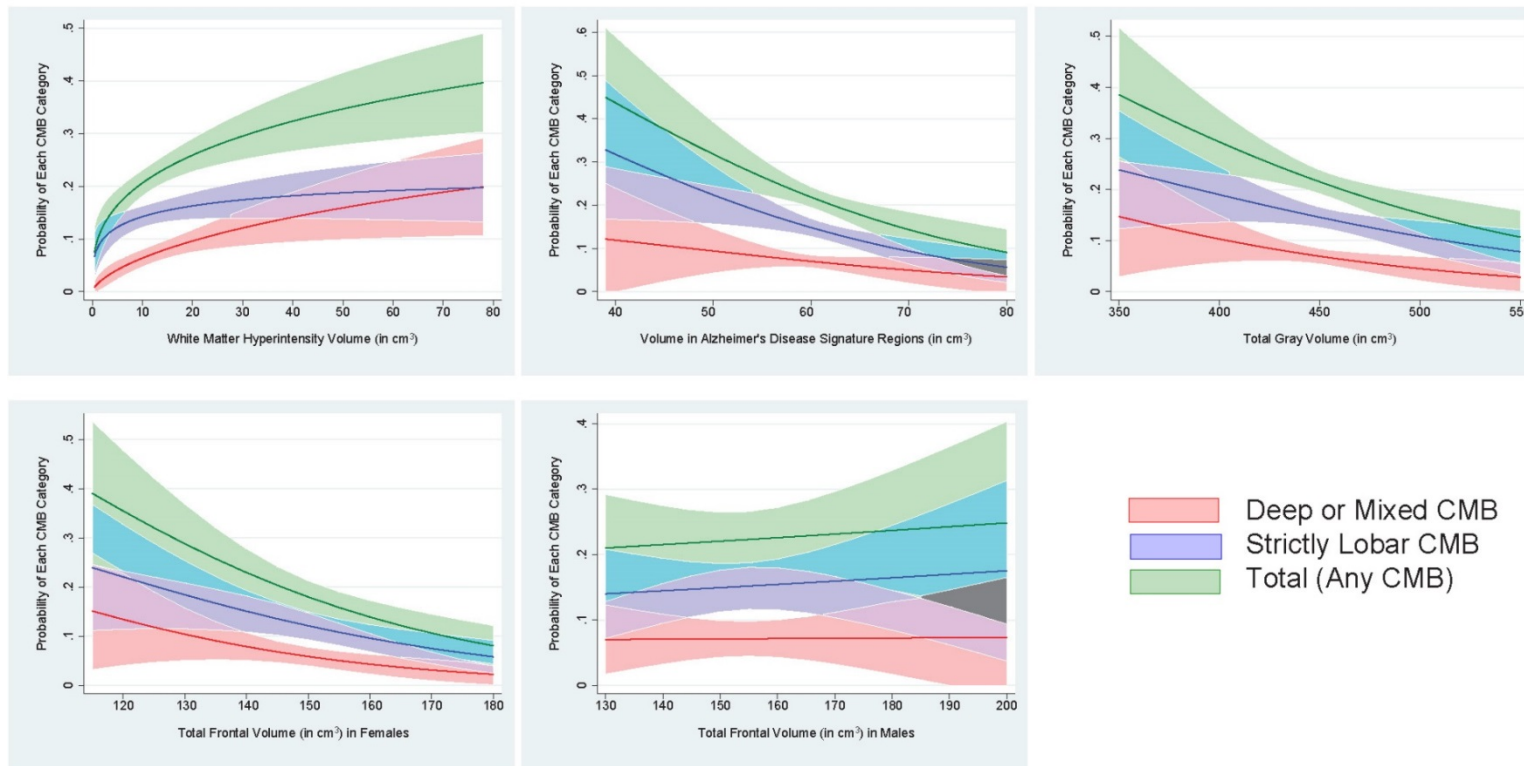

NOTE: These plots are the predictive margins from the multinomial logistic regression models adjusted for all covariates. The solid curves are the predicted probabilities while the shaded areas are the 95% confidence bands. Violet shaded areas indicate that the deep/mixed and strictly lobar CMB confidence intervals overlap. Aqua shaded areas indicate that the strictly lobar and total CMB

**Table I: Cognitive Outcomes in the Fifth Visit Cohort**

| Characteristic                                                                                                                    | All blacks and whites in the full fifth visit cohort (N=6,520) | Excluded from the Analysis (N=4,843) | Included in the Analysis (N=1,677) |
|-----------------------------------------------------------------------------------------------------------------------------------|----------------------------------------------------------------|--------------------------------------|------------------------------------|
| Age in years (Mean(SD))                                                                                                           | 76 ( 5)                                                        | 76 ( 5)                              | 76 ( 5)                            |
| Female (N (%))                                                                                                                    | 3835 (59)                                                      | 2829 (58)                            | 1006 (60)                          |
| Black (N (%))                                                                                                                     | 1544 (24)                                                      | 1103 (23)                            | 441 (26)                           |
| Field Center (N(%))                                                                                                               |                                                                |                                      |                                    |
| Forsyth County, NC                                                                                                                | 1439 (22)                                                      | 1049 (22)                            | 390 (23)                           |
| Jackson, MS                                                                                                                       | 1417 (22)                                                      | 976 (20)                             | 441 (26)                           |
| Suburban Minneapolis, MN                                                                                                          | 1903 (29)                                                      | 1499 (31)                            | 404 (24)                           |
| Washington County, MD                                                                                                             | 1761 (27)                                                      | 1319 (27)                            | 442 (26)                           |
| Prevalent Stroke (N(%))                                                                                                           | 273 ( 4)                                                       | 218 ( 5)                             | 55 ( 3)                            |
| Cognitive Diagnosis (N(%))                                                                                                        |                                                                |                                      |                                    |
| Normal                                                                                                                            | 4743 (73)                                                      | 3671 (77)                            | 1072 (64)                          |
| Mild Cognitive Impairment                                                                                                         | 1371 (21)                                                      | 766 (16)                             | 605 (36)                           |
| Dementia                                                                                                                          | 342 ( 5)                                                       | 342 ( 7)                             | 0 ( 0)                             |
| Prorated Mini-mental State Exam (Mean(SD))                                                                                        | 27 ( 3)                                                        | 27 ( 3)                              | 27 ( 2)                            |
| Number of failed cognitive domains (out of memory, language, visuospatial, executive function, and attention; N (%)) <sup>a</sup> |                                                                |                                      |                                    |
| 0                                                                                                                                 | 3959 (65)                                                      | 3070 (69)                            | 889 (54)                           |
| 1                                                                                                                                 | 1313 (21)                                                      | 834 (19)                             | 479 (29)                           |
| 2                                                                                                                                 | 515 ( 8)                                                       | 307 ( 7)                             | 208 (13)                           |
| 3                                                                                                                                 | 195 ( 3)                                                       | 148 ( 3)                             | 47 ( 3)                            |
| 4                                                                                                                                 | 111 ( 2)                                                       | 96 ( 2)                              | 15 ( 1)                            |
| 5                                                                                                                                 | 29 ( 0)                                                        | 26 ( 1)                              | 3 ( 0)                             |
| Substantial Cognitive Decline Between Visits (N (%)) <sup>b</sup>                                                                 | 4156 (64)                                                      | 2955 (62)                            | 1201 (72)                          |
| Delayed Word Recall Test (age-, sex-, and education-adjusted z-score; Mean (SD))                                                  | -0.93 (1.25)                                                   | -0.90 (1.27)                         | -1.00 (1.19)                       |
| Digit Symbol Substitution Test (age-, sex-, and education-adjusted z-score; Mean (SD))                                            | -0.47 (0.85)                                                   | -0.45 (0.86)                         | -0.53 (0.79)                       |
| Word Fluency Test ((age-, sex-, and education-adjusted z-score; Mean (SD))                                                        | -0.03 (0.99)                                                   | -0.03 (1.00)                         | -0.04 (0.96)                       |

Note: <sup>a</sup> Participants missing one or more cognitive domains were excluded from the frequencies. <sup>b</sup> Below the 10<sup>th</sup> percentile for change in the delayed Word Recall, Digit Symbol Substitution, or Word Fluency Test between visits or below the 20<sup>th</sup> percentile for change in two or more of these tests)

**Table II: Weighted Summary Statistics Stratified By Cerebral Microbleed Location**

| Characteristic                                                    | No CMB     | Deep or Mixed CMB | Strictly Lobar CMB |
|-------------------------------------------------------------------|------------|-------------------|--------------------|
| Observed Prevalence (%)                                           | 76         | 8                 | 16                 |
| Weighted Prevalence (%)                                           | 78         | 7                 | 14                 |
| Mild Cognitive Impairment (%)                                     | 21         | 28                | 28                 |
| <i>Covariates</i>                                                 |            |                   |                    |
| Female (%)                                                        | 63         | 57                | 52                 |
| Age in years (Mean(SD))                                           | 75 (5)     | 76 (5)            | 76 (6)             |
| Education (%)                                                     |            |                   |                    |
| Less than High School                                             | 10         | 13                | 14                 |
| High School, GED, or Vocational School                            | 40         | 46                | 40                 |
| Some College                                                      | 49         | 40                | 46                 |
| Race-site (%)                                                     |            |                   |                    |
| Forsyth whites                                                    | 20         | 30                | 22                 |
| Jackson blacks                                                    | 18         | 21                | 24                 |
| Minneapolis whites                                                | 32         | 24                | 33                 |
| Washington County whites                                          | 29         | 25                | 21                 |
| Diabetes (%)                                                      | 25         | 23                | 30                 |
| Hypertension (%)                                                  |            |                   |                    |
| Normal                                                            | 14         | 9                 | 8                  |
| Prehypertensive                                                   | 15         | 8                 | 20                 |
| Hypertensive                                                      | 71         | 83                | 72                 |
| Current or Former Smoker (%)                                      | 56         | 65                | 57                 |
| Estimated Total Intracranial Volume in cm <sup>3</sup> (Mean(SD)) | 1381 (150) | 1385 (157)        | 1407 (155)         |
| <i>Predictors of Interest</i>                                     |            |                   |                    |
| White Matter Hyperintensity Volume in cm <sup>3</sup> (Mean(SD))  | 14 (14)    | 24 (22)           | 19 (18)            |
| Total AD Signature Region Volume in cm <sup>3</sup> (Mean(SD))    | 60 (7)     | 59 (8)            | 60 (7)             |
| Total Gray Volume in cm <sup>3</sup> (Mean(SD))                   | 448 (44)   | 440 (50)          | 447 (45)           |
| Frontal Volume in cm <sup>3</sup> (Mean(SD))*                     |            |                   |                    |
| Females                                                           | 152 (15)   | 150 (17)          | 152 (17)           |
| Males                                                             | 147 (13)   | 141 (12)          | 142 (11)           |
| Males                                                             | 161 (14)   | 162 (16)          | 163 (15)           |
| Number of Lacunar Infarcts (%)                                    |            |                   |                    |
| 0                                                                 | 86         | 73                | 81                 |
| 1                                                                 | 11         | 19                | 14                 |
| 2                                                                 | 2          | 6                 | 4                  |
| ≥3                                                                | 1          | 2                 | 2                  |
| Number of Non-Lacunar Infarcts (%)                                |            |                   |                    |
| 0                                                                 | 91         | 83                | 86                 |
| 1                                                                 | 7          | 11                | 11                 |
| ≥2                                                                | 2          | 6                 | 3                  |
| Total Number of Infarcts (%)                                      |            |                   |                    |
| 0                                                                 | 80         | 62                | 72                 |
| 1                                                                 | 14         | 22                | 16                 |
| 2                                                                 | 4          | 10                | 7                  |
| ≥3                                                                | 2          | 6                 | 5                  |
| Copies of the APOE ε4 Allele (%)                                  |            |                   |                    |
| 0                                                                 | 73         | 71                | 72                 |
| 1                                                                 | 25         | 26                | 23                 |
| 2                                                                 | 2          | 3                 | 5                  |

NOTE: SD=Standard deviation. Statistics were weighted to account to account for sample selection and MRI refusal.\* The frontal volume exhibited significant interactions with sex; thus sex-specific summary statistics are presented along with the overall (combined sex) valu

**Table III: Modeling the Common Covariates Together Without Neurological Predictors**

| Predictor                              | CMB (Presence Versus Absence) |                | CMB Location             |                |                              |                |                                      |                |
|----------------------------------------|-------------------------------|----------------|--------------------------|----------------|------------------------------|----------------|--------------------------------------|----------------|
|                                        |                               |                | Deep/Mixed Versus No CMB |                | Strictly Lobar Versus No CMB |                | Strictly Lobar Versus Deep/Mixed CMB |                |
|                                        | RR                            | 95% CI         | RRR                      | 95% CI         | RRR                          | 95% CI         | RRR                                  | 95% CI         |
| Male                                   | 1.368                         | (1.104, 1.696) | 1.306                    | (0.814, 2.096) | 1.616                        | (1.168, 2.234) | 1.237                                | (0.724, 2.113) |
| Age (in 5 year increments)             | 1.138                         | (1.027, 1.260) | 1.141                    | (0.926, 1.407) | 1.214                        | (1.031, 1.429) | 1.063                                | (0.827, 1.367) |
| Education                              |                               |                |                          |                |                              |                |                                      |                |
| Less than High School-Reference        |                               |                |                          |                |                              |                |                                      |                |
| High School, GED, or Vocational School | 0.911                         | (0.671, 1.237) | 1.007                    | (0.536, 1.895) | 0.819                        | (0.499, 1.347) | 0.813                                | (0.391, 1.692) |
| Some College                           | 0.742                         | (0.543, 1.014) | 0.665                    | (0.345, 1.284) | 0.673                        | (0.409, 1.106) | 1.011                                | (0.475, 2.150) |
| Race-site:                             |                               |                |                          |                |                              |                |                                      |                |
| Forsyth Whites-Reference               |                               |                |                          |                |                              |                |                                      |                |
| Jackson Blacks                         | 1.023                         | (0.752, 1.391) | 0.745                    | (0.399, 1.390) | 1.235                        | (0.750, 2.034) | 1.659                                | (0.793, 3.467) |
| Minneapolis Whites                     | 0.803                         | (0.590, 1.093) | 0.460                    | (0.242, 0.874) | 0.952                        | (0.588, 1.543) | 2.068                                | (0.977, 4.375) |
| Washington County Whites               | 0.665                         | (0.483, 0.915) | 0.514                    | (0.276, 0.959) | 0.638                        | (0.385, 1.057) | 1.240                                | (0.590, 2.609) |
| Diabetes                               | 1.004                         | (0.807, 1.248) | 0.732                    | (0.449, 1.194) | 1.169                        | (0.841, 1.627) | 1.598                                | (0.918, 2.780) |
| Hypertension Status                    |                               |                |                          |                |                              |                |                                      |                |
| Normal-Reference                       |                               |                |                          |                |                              |                |                                      |                |
| Prehypertension                        | 1.625                         | (1.027, 2.572) | 0.881                    | (0.334, 2.320) | 2.351                        | (1.242, 4.452) | 2.669                                | (0.891, 7.999) |
| Hypertension                           | 1.529                         | (1.029, 2.271) | 1.826                    | (0.822, 4.056) | 1.614                        | (0.932, 2.796) | 0.884                                | (0.351, 2.223) |
| Current or Former Smoker               | 1.079                         | (0.868, 1.340) | 1.457                    | (0.920, 2.308) | 0.964                        | (0.697, 1.335) | 0.662                                | (0.390, 1.123) |

NOTE: RR=relative risk; RRR=relative risk ratio. These covariates were included in all Poisson (CMB presence) and multinomial logistic (CMB locations) regression models with the imaging/APOE predictors. The estimated total intracranial volume was included in models assessing brain volumes, thus was not included in this table. Models incorporated weights accounting for the MRI sampling and completion probabilities.

**Table IV: Modeling Each Neurological Predictor Separately Without Covariate Adjustments**

| Predictor                                                | CMB (Presence Versus Absence) |                | CMB Location             |                |                              |                |                                      |                |
|----------------------------------------------------------|-------------------------------|----------------|--------------------------|----------------|------------------------------|----------------|--------------------------------------|----------------|
|                                                          |                               |                | Deep/Mixed Versus No CMB |                | Strictly Lobar Versus No CMB |                | Strictly Lobar Versus Deep/Mixed CMB |                |
|                                                          | RR                            | 95% CI         | RRR                      | 95% CI         | RRR                          | 95% CI         | RRR                                  | 95% CI         |
| Log <sub>2</sub> (WMH Volume (cm <sup>3</sup> ))         | 1.266                         | (1.161, 1.381) | 1.552                    | (1.251, 1.925) | 1.277                        | (1.127, 1.446) | 0.823                                | (0.652, 1.039) |
| AD Signature Region Volume (in cm <sup>3</sup> )         | 0.985                         | (0.969, 1.002) | 0.974                    | (0.935, 1.015) | 0.985                        | (0.963, 1.007) | 1.011                                | (0.966, 1.058) |
| Total Gray Volume (in cm <sup>3</sup> )                  | 0.999                         | (0.996, 1.001) | 0.996                    | (0.990, 1.002) | 1.000                        | (0.996, 1.003) | 1.003                                | (0.997, 1.010) |
| Number of Lacunar Infarcts                               | 1.319                         | (1.153, 1.509) | 1.703                    | (1.270, 2.284) | 1.348                        | (1.055, 1.723) | 0.792                                | (0.564, 1.111) |
| Number of Non-Lacunar Infarcts                           | 1.380                         | (1.137, 1.674) | 1.781                    | (1.129, 2.809) | 1.446                        | (1.059, 1.975) | 0.812                                | (0.501, 1.316) |
| Total Number of Infarcts                                 | 1.315                         | (1.180, 1.465) | 1.659                    | (1.314, 2.094) | 1.362                        | (1.125, 1.650) | 0.821                                | (0.631, 1.068) |
| Copies of the <i>APOE</i> $\epsilon$ 4 Allele:           |                               |                |                          |                |                              |                |                                      |                |
| 0- Reference                                             |                               |                |                          |                |                              |                |                                      |                |
| 1                                                        | 0.999                         | (0.782, 1.277) | 1.097                    | (0.662, 1.818) | 0.951                        | (0.663, 1.364) | 0.867                                | (0.484, 1.552) |
| 2                                                        | 1.867                         | (1.186, 2.941) | 1.827                    | (0.662, 5.039) | 2.736                        | (1.218, 6.143) | 1.497                                | (0.532, 4.217) |
| <b>Predictor Exhibiting Significant Sex Interactions</b> |                               |                |                          |                |                              |                |                                      |                |
| Frontal Volume (in cm <sup>3</sup> )                     |                               |                |                          |                |                              |                |                                      |                |
| Female                                                   | 0.978                         | (0.968, 0.987) | 0.967                    | (0.947, 0.986) | 0.975                        | (0.962, 0.989) | 1.009                                | (0.987, 1.032) |
| Male                                                     | 1.006                         | (0.995, 1.017) | 1.005                    | (0.978, 1.032) | 1.009                        | (0.993, 1.026) | 1.005                                | (0.975, 1.035) |

NOTE: RR=relative risk; RRR=relative risk ratio. The Poisson (CMB presence) and multinomial logistic (CMB location) regression models were not adjusted for any covariates. The number of lacunar infarcts and the total number of infarcts were modeled with a single variable that took values 0, 1, 2, or 3 (for  $\geq 3$ ) infarcts. The number of non-lacunar infarcts was modeled with a single variable that took values 0, 1, or 2 (for  $\geq 2$ ) infarcts. Models incorporated weights accounting for the MRI sampling and completion probabilities.
